# Supplementary material
Source: PubMed Central journal article supplement (PMC3159817)
Supplement: NIHMS309135-supplement-2_si_002.pdf [file NIHMS309135-supplement-2_si_002.pdf]

The following residues interact with AnalytiCon compounds at Site 507 on the ribonuclease H domain of HIV-1 reverse transcriptase:

- hydrogen bonds to backbone atoms:
  1. on p66: T403, E430, and W535
  2. on p51: K331 and L425
- hydrogen bonds to side chain atoms:
  1. on p66: E404, K431, and Q507
- hydrophobic interactions:
  1. on p66: W401, E404 (base of side chain), Q507 (base of side chain), and W535
  2. on p51: K331 (base of side chain), L422, and L425

The following residues surround and interact with the Life Chemicals hydrazone/hydrazine compounds at Site 500S on ribonuclease H domain of HIV-1 reverse transcriptase and the substrate:

- hydrogen bonds: N418 and to the DNA:RNA substrate
- hydrophobic interactions:
  1. on p66: Y405, W406, and K424
  2. on p51: P420, P421, and V423
- other surrounding residues:
  1. on p66: Q500 and Y501
  2. on p51: N418 and T419
